# Supplementary material for: Stimulation of Oligonucleotide-Directed Gene Correction by Redβ Expression and MSH2 Depletion in Human HT1080 Cells
Source: PubMed Central journal article supplement — Mol Cells. 2014 Nov 26;38(1):33–9. doi: 10.14348/molcells.2015.2163 (PMC4314130; doi:10.14348/molcells.2015.2163), 2014-11-26
Supplement: molcell-38-1-33-supple.pdf [file molcell-38-1-33-supple.pdf]

**Table S1. RNA oligonucleotides used for siRNA**

| Specificity              | Sense (5' – 3')        | Anti-sense (5' – 3')  |
|--------------------------|------------------------|-----------------------|
| MHS2 siGENOME duplex (1) | GAAGAGACCUUAACUAUGCUU  | GCAUAGUUAAGGUCUCUUCUU |
| MHS2 siGENOME duplex (2) | UUGCAGAGCUUGCUGAAUUUUU | AAAUUAGCAAGCUCUGCAAUU |
| MHS2 siGENOME duplex (3) | GUGCACAGUUUGGAUUAUUUU  | UAAUAUCCAAACUGUGCACUU |
| MHS2 siGENOME duplex (4) | CAGCAAACUUACAAGAUUGUU  | CAAUCUUGUAAGUUUGCUGUU |
| Control                  | GGCUACGUCCAGGAGCGCACC  | UGCGCUCCUGGACGUAGCCUU |

**Table S2. ssOR with transient Red $\beta$  expression in HT1080 cells**

| Cells (x10 <sup>6</sup> ) | <sup>a</sup> pcDNA/<br>PGK-neo* | <sup>a</sup> pcDNA-nlsRed $\beta$ /<br>PGK-neo* | ssO | G418 <sup>R</sup><br>colonies | <sup>b</sup> Frequency |
|---------------------------|---------------------------------|-------------------------------------------------|-----|-------------------------------|------------------------|
| 3                         | 24                              | 0                                               | CO  | 0                             | 0                      |
| 3                         | 12                              | 12                                              | CO  | 0                             | 0                      |
| 3                         | 24                              | 0                                               | RO  | 14                            | 4.7                    |
| 3                         | 12                              | 12                                              | RO  | 15                            | 5.0                    |

<sup>a</sup> Weights ( $\mu$ g) of plasmids transfected are shown. <sup>b</sup> Colonies per transfected 10<sup>6</sup> cells).
